# Supplementary material for: Topological Cluster Analysis Reveals the Systemic Organization of the Caenorhabditis elegans Connectome
Source: PLoS Comput Biol. 2011 May 19;7(5):e1001139. doi: 10.1371/journal.pcbi.1001139 (PMC3098222; doi:10.1371/journal.pcbi.1001139)
Supplement: Table S2 — Classification of the neurons in the C. elegans connectome by their topological roles. (0.04 MB XLS) [file pcbi.1001139.s008.xls]

## Sheet: SI Table 2
R1	R2	R3	R5	R6
AFDL	ADFL	ADAL	AIAR	AIZL
AFDR	ADFR	ADAR	DD03	AVAL
AS07	ADLR	ADEL		AVAR
AS08	AIAL	ADER		RIAL
AS09	AIBL	ADLL		RIAR			P	Z
AS10	AIBR	AIML			ultra-peripheral nodes	R1	P=0	Z<2.5
AS11	AIMR	ALA			peripheral nodes	R2	P<0.625	Z<2.5
ASER	AINL	ALNR			non-hub connector nodes	R3	0.625<P<0.8	Z<2.5
ASGL	AINR	ASHR			non-hub kinless nodes	R4	P>0/8	Z<2.5
ASIR	AIYL	AVBL			provincial hubs	R5	P<0.3	Z>2.5
ASJR	AIYR	AVBR			connector hubs	R6	0.3<P<0.75	Z>2.5
AWAL	AIZR	AVEL			kinless nodes	R7	P>0.75	Z>2/5
AWCR	ALML	AVER
DA07	ALMR	AVHL
DA08	ALNL	AVHR
DA09	AQR	AVKL
DB05	AS01	AVL
DB06	AS02	BAGR
DB07	AS03	HSNR
IL1R	AS04	PVT
IL2DL	AS05	RICL		Role distribution by Cell type
IL2DR	AS06	RIFL			R1	R2	R3	R5	R6
IL2VL	ASEL	RIGL		Sensory	15	57	6	0	0
IL2VR	ASGR	RIMR		Inter	6	62	23	1	5
LUAL	ASHL	RIR		Motor	21	77	5	1	0
LUAR	ASIL	SAADL
PDA	ASJL	SAADR
PDB	ASKL	SAAVR
PHBL	ASKR	SABD
PHCL	AUAL	SABVL
PLNL	AUAR	SMBDL
PLNR	AVDL	SMBDR
RMER	AVDR	VB01
SIAVL	AVFL	VC05
SIBDL	AVFR
URAVL	AVG
URAVR	AVJL
VA10	AVJR
VA11	AVKR
VA12	AVM
VB11	AWAR
VD08	AWBL
	AWBR
	AWCL
	BAGL
	BDUL
	BDUR
	CEPDL
	CEPDR
	CEPVL
	CEPVR
	DA01
	DA02
	DA03
	DA04
	DA05
	DA06
	DB01
	DB02
	DB03
	DB04
	DD01
	DD02
	DD04
	DD05
	DD06
	DVA
	DVB
	DVC
	FLPL
	FLPR
	HSNL
	IL1DL
	IL1DR
	IL1L
	IL1VL
	IL1VR
	IL2L
	IL2R
	OLLL
	OLLR
	OLQDL
	OLQDR
	OLQVL
	OLQVR
	PDEL
	PDER
	PHAL
	PHAR
	PHBR
	PHCR
	PLML
	PLMR
	PQR
	PVCL
	PVCR
	PVDL
	PVDR
	PVM
	PVNL
	PVNR
	PVPL
	PVPR
	PVQL
	PVQR
	PVR
	PVWL
	PVWR
	RIBL
	RIBR
	RICR
	RID
	RIFR
	RIGR
	RIH
	RIML
	RIPL
	RIPR
	RIS
	RIVL
	RIVR
	RMDDL
	RMDDR
	RMDL
	RMDR
	RMDVL
	RMDVR
	RMED
	RMEL
	RMEV
	RMFL
	RMFR
	RMGL
	RMGR
	RMHL
	RMHR
	SAAVL
	SABVR
	SDQL
	SDQR
	SIADL
	SIADR
	SIAVR
	SIBDR
	SIBVL
	SIBVR
	SMBVL
	SMBVR
	SMDDL
	SMDDR
	SMDVL
	SMDVR
	URADL
	URADR
	URBL
	URBR
	URXL
	URXR
	URYDL
	URYDR
	URYVL
	URYVR
	VA01
	VA02
	VA03
	VA04
	VA05
	VA06
	VA07
	VA08
	VA09
	VB02
	VB03
	VB04
	VB05
	VB06
	VB07
	VB08
	VB09
	VB10
	VC01
	VC02
	VC03
	VC04
	VD01
	VD02
	VD03
	VD04
	VD05
	VD06
	VD07
	VD09
	VD10
	VD11
	VD12
	VD13
