# Supplementary material for: Topological Cluster Analysis Reveals the Systemic Organization of the Caenorhabditis elegans Connectome
Source: PLoS Comput Biol. 2011 May 19;7(5):e1001139. doi: 10.1371/journal.pcbi.1001139 (PMC3098222; doi:10.1371/journal.pcbi.1001139)
Supplement: Table S3 — Values of within-module weights Z and participation coefficients P of each neuron in the C. elegans connectome with basic statistical analysis. (0.04 MB XLS) [file pcbi.1001139.s009.xls]

## Sheet: SI Table 3
	P	Z
'ADAL'	0.637949	-0.727556
'ADAR'	0.6569	-0.641873
'ADEL'	0.690606	-1.12108
'ADER'	0.678254	-1.00308
'ADFL'	0.500534	-0.170615
'ADFR'	0.595112	-0.0849316
'ADLL'	0.639232	-0.513348
'ADLR'	0.545118	-0.170615
'AFDL'	0	-0.513348
'AFDR'	0	-0.04209
'AIAL'	0.0427694	2.35704
'AIAR'	0.0377219	2.87114
'AIBL'	0.497613	2.22852
'AIBR'	0.556769	2.22852
'AIML'	0.681359	-0.856081
'AIMR'	0.592593	-0.813239
'AINL'	0.54142	-0.856081
'AINR'	0.447087	-0.641873
'AIYL'	0.263114	1.286
'AIYR'	0.224082	1.11463
'AIZL'	0.320881	2.74262
'AIZR'	0.387072	1.37168
'ALA'	0.708333	-1.16425
'ALML'	0.455775	-0.44217
'ALMR'	0.391111	-0.611007
'ALNL'	0.429752	-1.15597
'ALNR'	0.64	-1.32734
'AQR'	0.577098	0.708053
'AS01'	0.586667	-0.526589
'AS02'	0.423077	-1.03931
'AS03'	0.439815	-0.826416
'AS04'	0.362812	-1.14576
'AS05'	0.532236	-1.21672
'AS06'	0.474506	-1.03931
'AS07'	0	-0.0876127
'AS08'	0	-0.374635
'AS09'	0	-0.138264
'AS10'	0	-0.611007
'AS11'	0	-0.408403
'ASEL'	0.0363512	0.771901
'ASER'	0	0.986109
'ASGL'	0	-0.556189
'ASGR'	0.0768	-0.470506
'ASHL'	0.610649	-0.213457
'ASHR'	0.625529	0.000751607
'ASIL'	0.104938	-0.770398
'ASIR'	0	-0.770398
'ASJL'	0.0798611	-0.513348
'ASJR'	0	-0.513348
'ASKL'	0.118924	0.429168
'ASKR'	0.18375	0.0435932
'AUAL'	0.523498	-0.465194
'AUAR'	0.452346	-0.298752
'AVAL'	0.602272	4.94373
'AVAR'	0.587452	4.82554
'AVBL'	0.646005	1.22932
'AVBR'	0.672216	1.21243
'AVDL'	0.431842	0.908525
'AVDR'	0.493035	0.908525
'AVEL'	0.694485	1.03278
'AVER'	0.68227	1.2658
'AVFL'	0.493304	0.947701
'AVFR'	0.383046	0.770289
'AVG'	0.393162	-0.290217
'AVHL'	0.708526	-0.968345
'AVHR'	0.708189	-0.968345
'AVJL'	0.47308	0.216294
'AVJR'	0.510136	-0.0369616
'AVKL'	0.701147	0.413031
'AVKR'	0.556606	0.354026
'AVL'	0.682615	-0.590044
'AVM'	0.22	-0.0538453
'AWAL'	0	-0.213457
'AWAR'	0.182035	0.0864349
'AWBL'	0.356481	-0.29914
'AWBR'	0.484912	-0.599031
'AWCL'	0.18375	0.0435932
'AWCR'	0	0.257801
'BAGL'	0.59375	-0.565059
'BAGR'	0.644044	-0.698212
'BDUL'	0.526627	-0.509705
'BDUR'	0.396122	-0.307101
'CEPDL'	0.147461	0.633321
'CEPDR'	0.119629	0.666609
'CEPVL'	0.112265	0.267149
'CEPVR'	0.112265	0.267149
'DA01'	0.597551	-0.188915
'DA02'	0.559016	-0.684486
'DA03'	0.476371	-0.0812868
'DA04'	0.509183	-0.43611
'DA05'	0.517025	-0.719969
'DA06'	0.300994	0.0474569
'DA07'	0	-0.644774
'DA08'	0	-0.323984
'DA09'	0	-0.239566
'DB01'	0.34453	0.344501
'DB02'	0.19996	0.521913
'DB03'	0.290879	0.983183
'DB04'	0.444444	-0.790933
'DB05'	0	-0.543472
'DB06'	0	-0.391519
'DB07'	0	-0.492821
'DD01'	0.206531	2.11862
'DD02'	0.0791454	2.43796
'DD03'	0.0614764	2.61537
'DD04'	0.0449201	1.30252
'DD05'	0.0333238	0.344501
'DD06'	0.107755	-0.239566
'DVA'	0.49385	1.41504
'DVB'	0.547009	-0.408403
'DVC'	0.611328	2.18316
'FLPL'	0.285639	0.435782
'FLPR'	0.341306	0.0305732
'HSNL'	0.5896	-0.29914
'HSNR'	0.687222	-0.599031
'IL1DL'	0.113866	-0.298752
'IL1DR'	0.0555102	-0.198887
'IL1L'	0.0713306	-0.465194
'IL1R'	0	-0.132311
'IL1VL'	0.0605469	-0.298752
'IL1VR'	0.0525931	-0.132311
'IL2DL'	0	-0.298752
'IL2DR'	0	-0.365329
'IL2L'	0.172336	-0.0657339
'IL2R'	0.107755	-0.232176
'IL2VL'	0	-0.165599
'IL2VR'	0	0.133996
'LUAL'	0	-0.205798
'LUAR'	0	-0.273333
'OLLL'	0.119853	1.13265
'OLLR'	0.13689	1.66526
'OLQDL'	0.0973044	-0.0990222
'OLQDR'	0.155864	-0.232176
'OLQVL'	0.248783	-0.0990222
'OLQVR'	0.0867769	0.0674194
'PDA'	0	-0.611007
'PDB'	0	-0.57724
'PDEL'	0.264615	0.131875
'PDER'	0.421582	0.19941
'PHAL'	0.289116	-0.205798
'PHAR'	0.405864	-0.340868
'PHBL'	0	-0.0369616
'PHBR'	0.114952	-0.0200779
'PHCL'	0	-0.307101
'PHCR'	0.0688776	-0.340868
'PLML'	0.244898	-0.695425
'PLMR'	0.112457	-0.25645
'PLNL'	0	-0.984606
'PLNR'	0	-1.07029
'PQR'	0.277778	-0.12138
'PVCL'	0.30296	2.02285
'PVCR'	0.335033	2.0735
'PVDL'	0.15879	-0.44217
'PVDR'	0.04543	-0.0876127
'PVM'	0.444444	-0.323984
'PVNL'	0.351049	-0.00319421
'PVNR'	0.525	-0.12138
'PVPL'	0.585106	0.236018
'PVPR'	0.616056	1.2981
'PVQL'	0.301175	0.386326
'PVQR'	0.524793	0.343485
'PVR'	0.486269	-0.070729
'PVT'	0.666247	0
'PVWL'	0.32	-0.594123
'PVWR'	0.197531	-0.661658
'RIAL'	0.380963	3.89558
'RIAR'	0.342201	3.829
'RIBL'	0.44595	1.36566
'RIBR'	0.404513	1.46553
'RICL'	0.684225	-0.431906
'RICR'	0.582414	-0.298752
'RID'	0.54957	-0.340868
'RIFL'	0.633469	-0.492821
'RIFR'	0.607459	-0.357752
'RIGL'	0.67673	0.0590044
'RIGR'	0.622922	-0.0590044
'RIH'	0.236219	1.99814
'RIML'	0.624783	0.729059
'RIMR'	0.650505	1.20032
'RIPL'	0.210799	0.200573
'RIPR'	0.145996	0.633321
'RIR'	0.714444	-0.513348
'RIS'	0.567381	0.267149
'RIVL'	0.533163	-0.7315
'RIVR'	0.427978	-0.398617
'RMDDL'	0.0240928	1.36566
'RMDDR'	0.066374	1.49882
'RMDL'	0.29834	0.433591
'RMDR'	0.302343	0.400303
'RMDVL'	0.0464853	1.39895
'RMDVR'	0.0464853	1.39895
'RMED'	0.444444	-0.864654
'RMEL'	0.15879	-0.631635
'RMER'	0	-0.398617
'RMEV'	0.35875	-0.298752
'RMFL'	0.59949	-1.18009
'RMFR'	0.498866	-1.2981
'RMGL'	0.564481	-0.232176
'RMGR'	0.60397	-0.565059
'RMHL'	0.475207	-0.831365
'RMHR'	0.444444	-0.897942
'SAADL'	0.638183	-0.513348
'SAADR'	0.644313	-0.599031
'SAAVL'	0.620118	-0.04209
'SAAVR'	0.642509	-0.641873
'SABD'	0.726757	-1.21672
'SABVL'	0.654321	-0.492821
'SABVR'	0.607438	-0.594123
'SDQL'	0.54321	-0.611007
'SDQR'	0.552632	-0.44217
'SIADL'	0.244898	-1.13096
'SIADR'	0.277778	-1.16425
'SIAVL'	0	-1.0311
'SIAVR'	0.18	-1.0311
'SIBDL'	0	-1.09767
'SIBDR'	0.378698	-0.997807
'SIBVL'	0.498615	-0.997807
'SIBVR'	0.231111	-0.897942
'SMBDL'	0.686851	-0.813239
'SMBDR'	0.72	-0.941764
'SMBVL'	0.481633	-0.470506
'SMBVR'	0.525253	-0.556189
'SMDDL'	0.326111	0.267149
'SMDDR'	0.510933	0.233861
'SMDVL'	0.197754	0.566744
'SMDVR'	0.107915	0.899628
'URADL'	0.260355	-0.964519
'URADR'	0.142012	-0.93123
'URAVL'	0	-0.93123
'URAVR'	0	-0.864654
'URBL'	0.431002	-0.764789
'URBR'	0.313776	-0.565059
'URXL'	0.466389	-0.365329
'URXR'	0.353715	-0.298752
'URYDL'	0.2816	-0.631635
'URYDR'	0.302457	-0.698212
'URYVL'	0.308673	-0.565059
'URYVR'	0.283039	-0.465194
'VA01'	0.567474	-1.00383
'VA02'	0.378225	0.0251602
'VA03'	0.478949	-0.116769
'VA04'	0.42599	-0.43611
'VA05'	0.506942	-0.649004
'VA06'	0.511736	-0.649004
'VA07'	0.433076	-0.719969
'VA08'	0.5	0.309019
'VA09'	0.459864	0.273536
'VA10'	0	-0.560356
'VA11'	0	0.114992
'VA12'	0	0.233177
'VB01'	0.700349	-0.826416
'VB02'	0.369388	0.202572
'VB03'	0.114952	-0.0812868
'VB04'	0.33241	-0.649004
'VB05'	0.119511	-0.152251
'VB06'	0.315689	-0.116769
'VB07'	0.475309	-0.611007
'VB08'	0.348188	0.983183
'VB09'	0.499916	-0.329663
'VB10'	0.185493	-0.357752
'VB11'	0	-0.44217
'VC01'	0.138115	0.48643
'VC02'	0.2458	0.557395
'VC03'	0.263236	0.770289
'VC04'	0.124444	-1.21672
'VC05'	0.665289	-1.32317
'VD01'	0.548525	0.663842
'VD02'	0.0738322	1.87024
'VD03'	0.0843573	1.40897
'VD04'	0.184118	0.876736
'VD05'	0.170168	1.08963
'VD06'	0.118571	0.912218
'VD07'	0.0605469	-0.613522
'VD08'	0	-1.21672
'VD09'	0.113866	-0.613522
'VD10'	0.498047	-0.968345
'VD11'	0.244898	-0.695425
'VD12'	0.30839	-0.509705
'VD13'	0.202449	-0.273333
