# Supplementary material for: Topological Cluster Analysis Reveals the Systemic Organization of the Caenorhabditis elegans Connectome
Source: PLoS Comput Biol. 2011 May 19;7(5):e1001139. doi: 10.1371/journal.pcbi.1001139 (PMC3098222; doi:10.1371/journal.pcbi.1001139)
Supplement: Table S4 — Association between muscles and the clusters. The lists of IQV values and dominant cluster association information of each muscle. (0.03 MB XLS) [file pcbi.1001139.s010.xls]

## Sheet: SI Table 4
	IQV	Dominant cluster
'MANAL'	0	21
'MDL01'	0	12
'MDL02'	0.32	12
'MDL03'	0.21875	12
'MDL04'	0.244898	12
'MDL05'	0.518519	12
'MDL06'	0.375	12
'MDL07'	0.32	22
'MDL08'	0.625	22
'MDL09'	0	22
'MDL10'	0	22
'MDL11'	0.21875	22
'MDL12'	0.244898	22
'MDL13'	0.375	22
'MDL14'	0.345679	22
'MDL15'	0.375	21
'MDL16'	0.5	21
'MDL17'	0.277778	21
'MDL18'	0.375	21
'MDL19'	0	21
'MDL20'	0.32	21
'MDL21'	0	21
'MDL22'	0	21
'MDL23'	0	21
'MDL24'	0	21
'MDR01'	0.197531	12
'MDR02'	0.277778	12
'MDR03'	0.37037	12
'MDR04'	0.408163	12
'MDR05'	0.56	12
'MDR06'	0.444444	12
'MDR07'	0.32	22
'MDR08'	0.65625	22
'MDR09'	0	22
'MDR10'	0	22
'MDR11'	0.21875	22
'MDR12'	0.244898	22
'MDR13'	0.375	22
'MDR14'	0.21875	22
'MDR15'	0.375	21
'MDR16'	0.5	21
'MDR17'	0.277778	21
'MDR18'	0.375	21
'MDR19'	0	21
'MDR20'	0.32	21
'MDR21'	0	21
'MDR22'	0	21
'MDR23'	0	21
'MDR24'	0	21
'MVL01'	0.21875	12
'MVL02'	0.244898	12
'MVL03'	0.21875	12
'MVL04'	0.244898	12
'MVL05'	0.571429	12
'MVL06'	0.32	12
'MVL07'	0.277778	22
'MVL08'	0.611111	22
'MVL09'	0.375	22
'MVL10'	0.444444	22
'MVL11'	0	22
'MVL12'	0.21875	22
'MVL13'	0.32	22
'MVL14'	0	22
'MVL15'	0.244898	22
'MVL16'	0	22
'MVL17'	0.32	22
'MVL18'	0.375	22
'MVL19'	0	21
'MVL20'	0.5	21
'MVL21'	0	21
'MVL22'	0	21
'MVL23'	0	21
'MVR01'	0.31405	12
'MVR02'	0.21875	12
'MVR03'	0.40625	12
'MVR04'	0.21875	12
'MVR05'	0.5	12
'MVR06'	0.277778	12
'MVR07'	0.567901	22
'MVR08'	0.5	12
'MVR09'	0	22
'MVR10'	0.32	22
'MVR11'	0	22
'MVR12'	0	22
'MVR13'	0	22
'MVR14'	0	22
'MVR15'	0.244898	22
'MVR16'	0	22
'MVR17'	0.32	22
'MVR18'	0.375	22
'MVR19'	0	21
'MVR20'	0.5	21
'MVR21'	0	21
'MVR22'	0	21
'MVR23'	0	21
'MVR24'	0	21
'MVULVA'	0.32	22
